# Supplementary material for: Diameter and chiral angle distribution dependencies on the carbon precursors in surface-grown single-walled carbon nanotubes
Source: Royal Society of Chemistry journal article supplement (doi:10.1039/c2nr32276e), 2012-01-01
Supplement: c2nr32276e.pdf [file c2nr32276e.pdf]

## Supporting Information

**Table S1.** (n,m) resolved SWNTs synthesized on Fe catalyst using CO at 800 °C.

| <b>Indices (n,m)</b> | <b>Diameter (nm)</b> | <b>Chiral angle (°)</b> | <b>Metallic/Semiconducting</b> |
|----------------------|----------------------|-------------------------|--------------------------------|
| (7,3)                | 0.70                 | 17.0                    | S                              |
| (6,5)                | 0.75                 | 27.0                    | S                              |
| (6,5)                | 0.75                 | 27.0                    | S                              |
| (7,4)                | 0.76                 | 21.1                    | M                              |
| (7,4)                | 0.76                 | 21.1                    | M                              |
| (7,4)                | 0.76                 | 21.1                    | M                              |
| (7,4)                | 0.76                 | 21.1                    | M                              |
| (7,4)                | 0.76                 | 21.1                    | M                              |
| (8,3)                | 0.77                 | 15.3                    | S                              |
| (9,2)                | 0.80                 | 9.8                     | S                              |
| (6,6)                | 0.81                 | 30                      | M                              |
| (6,6)                | 0.81                 | 30                      | M                              |
| (6,6)                | 0.81                 | 30                      | M                              |
| (7,5)                | 0.82                 | 24.5                    | S                              |
| (7,5)                | 0.82                 | 24.5                    | S                              |
| (7,5)                | 0.82                 | 24.5                    | S                              |
| (7,5)                | 0.82                 | 24.5                    | S                              |
| (8,4)                | 0.83                 | 19.1                    | S                              |
| (8,4)                | 0.83                 | 19.1                    | S                              |
| (8,4)                | 0.83                 | 19.1                    | S                              |
| (8,4)                | 0.83                 | 19.1                    | S                              |
| (8,4)                | 0.83                 | 19.1                    | S                              |
| (8,4)                | 0.83                 | 19.1                    | S                              |
| (10,2)               | 0.87                 | 8.9                     | S                              |
| (7,6)                | 0.88                 | 27.5                    | S                              |
| (7,6)                | 0.88                 | 27.5                    | S                              |
| (7,6)                | 0.88                 | 27.5                    | S                              |
| (7,6)                | 0.88                 | 27.5                    | S                              |
| (9,4)                | 0.90                 | 17.5                    | S                              |
| (10,3)               | 0.92                 | 12.7                    | S                              |
| (12,0)               | 0.94                 | 0                       | M                              |
| (7,7)                | 0.95                 | 30                      | M                              |
| (7,7)                | 0.95                 | 30                      | M                              |
| (11,2)               | 0.95                 | 8.2                     | M                              |
| (8,6)                | 0.95                 | 25.3                    | S                              |
| (8,6)                | 0.95                 | 25.3                    | S                              |
| (8,6)                | 0.95                 | 25.3                    | S                              |
| (8,6)                | 0.95                 | 25.3                    | S                              |
| (8,6)                | 0.95                 | 25.3                    | S                              |
| (8,6)                | 0.95                 | 25.3                    | S                              |
| (8,6)                | 0.95                 | 25.3                    | S                              |
| (8,6)                | 0.95                 | 25.3                    | S                              |
| (8,6)                | 0.95                 | 25.3                    | S                              |
| (9,5)                | 0.96                 | 20.6                    | S                              |

|         |      |      |   |
|---------|------|------|---|
| (9,5)   | 0.96 | 20.6 | S |
| (9,5)   | 0.96 | 20.6 | S |
| (9,5)   | 0.96 | 20.6 | S |
| (11,3)  | 1.00 | 11.7 | S |
| (9,6)   | 1.02 | 23.4 | M |
| (9,6)   | 1.02 | 23.4 | M |
| (9,6)   | 1.02 | 23.4 | M |
| (10,5)  | 1.04 | 19.1 | S |
| (10,5)  | 1.04 | 19.1 | S |
| (10,5)  | 1.04 | 19.1 | S |
| (10,5)  | 1.04 | 19.1 | S |
| (11,4)  | 1.05 | 14.9 | S |
| (8,8)   | 1.09 | 30   | M |
| (8,8)   | 1.09 | 30   | M |
| (8,8)   | 1.09 | 30   | M |
| (9,7)   | 1.09 | 25.9 | S |
| (9,7)   | 1.09 | 25.9 | S |
| (9,7)   | 1.09 | 25.9 | S |
| (9,7)   | 1.09 | 25.9 | S |
| (9,7)   | 1.09 | 25.9 | S |
| (9,7)   | 1.09 | 25.9 | S |
| (9,7)   | 1.09 | 25.9 | S |
| (9,7)   | 1.09 | 25.9 | S |
| (10,6)  | 1.10 | 21.8 | S |
| (10,6)  | 1.10 | 21.8 | S |
| (10,6)  | 1.10 | 21.8 | S |
| (14,0)  | 1.10 | 0    | S |
| (9,8)   | 1.15 | 28.1 | S |
| (9,8)   | 1.15 | 28.1 | S |
| (10,7)  | 1.16 | 24.2 | M |
| (10,7)  | 1.16 | 24.2 | M |
| (11,6)  | 1.17 | 20.4 | S |
| (13,4)  | 1.21 | 13.0 | M |
| (9,9)   | 1.22 | 30   | M |
| (11,7)  | 1.23 | 22.7 | S |
| (12,6)  | 1.24 | 19.1 | M |
| (15,2)  | 1.26 | 6.2  | S |
| (13,5)  | 1.26 | 15.6 | S |
| (13,5)  | 1.26 | 15.6 | M |
| (10,9)  | 1.29 | 28.3 | S |
| (11,8)  | 1.29 | 24.8 | M |
| (14,5)  | 1.34 | 14.7 | M |
| (11,9)  | 1.36 | 26.7 | S |
| (11,9)  | 1.36 | 26.7 | S |
| (17,2)  | 1.42 | 5.5  | M |
| (11,11) | 1.49 | 30   | M |
| (12,10) | 1.50 | 27.0 | S |
| (16,6)  | 1.54 | 15.3 | S |
| (12,11) | 1.56 | 28.6 | S |

|        |      |      |   |
|--------|------|------|---|
| (19,2) | 1.57 | 4.95 | S |
| (15,8) | 1.58 | 20.0 | S |

**Table S2.** (n,m) resolved SWNTs synthesized on Fe catalyst using CH<sub>4</sub> at 800 °C.

| <b>Indices (n,m)</b> | <b>Diameter (nm)</b> | <b>Chiral angle (°)</b> | <b>Metallic/Semiconducting</b> |
|----------------------|----------------------|-------------------------|--------------------------------|
| (9,7)                | 1.09                 | 25.9                    | S                              |
| (12,4)               | 1.13                 | 13.9                    | S                              |
| (9,8)                | 1.15                 | 28.1                    | S                              |
| (13,3)               | 1.15                 | 10.2                    | S                              |
| (11,8)               | 1.29                 | 24.8                    | M                              |
| (15,6)               | 1.47                 | 16.1                    | M                              |
| (15,6)               | 1.47                 | 16.1                    | M                              |
| (15,6)               | 1.47                 | 16.1                    | M                              |
| (15,6)               | 1.47                 | 16.1                    | M                              |
| (12,10)              | 1.49                 | 27                      | S                              |
| (12,10)              | 1.49                 | 27                      | S                              |
| (12,10)              | 1.5                  | 27                      | S                              |
| (14,8)               | 1.51                 | 21.1                    | M                              |
| (18,3)               | 1.54                 | 7.6                     | M                              |
| (12,11)              | 1.56                 | 28.6                    | S                              |
| (14,9)               | 1.57                 | 22.8                    | S                              |
| (16,7)               | 1.6                  | 17.2                    | M                              |
| (19,3)               | 1.61                 | 7.2                     | S                              |
| (17,6)               | 1.61                 | 14.6                    | S                              |
| (20,2)               | 1.65                 | 4.7                     | M                              |
| (16,8)               | 1.66                 | 19.1                    | S                              |
| (15,10)              | 1.71                 | 23.4                    | S                              |
| (18,7)               | 1.75                 | 15.7                    | S                              |
| (17,9)               | 1.79                 | 19.9                    | S                              |
| (16,11)              | 1.84                 | 23.9                    | S                              |
| (14,14)              | 1.9                  | 30                      | M                              |
| (25,1)               | 2                    | 1.95                    | M                              |
| (20,10)              | 2.07                 | 19.1                    | S                              |
| (22,8)               | 2.11                 | 14.9                    | S                              |
| (26,3)               | 2.16                 | 5.4                     | S                              |
| (26,16)              | 2.22                 | 22.2                    | S                              |
| (22,10)              | 2.22                 | 17.8                    | M                              |
| (28,1)               | 2.23                 | 1.7                     | M                              |
| (18,15)              | 2.24                 | 27                      | M                              |
| (17,17)              | 2.3                  | 30                      | M                              |
| (23,10)              | 2.3                  | 17.2                    | S                              |
| (26,6)               | 2.31                 | 10.2                    | S                              |
| (19,15)              | 2.31                 | 26.1                    | S                              |
| (26,7)               | 2.36                 | 11.6                    | S                              |
| (26,7)               | 2.36                 | 11.6                    | S                              |
| (29,4)               | 2.37                 | 6.4                     | S                              |
| (27,6)               | 2.39                 | 9.83                    | M                              |

|         |      |      |   |
|---------|------|------|---|
| (26,8)  | 2.41 | 13   | M |
| (18,18) | 2.44 | 30   | M |
| (26,9)  | 2.47 | 14.3 | S |
| (21,16) | 2.52 | 25.5 | S |
| (30,4)  | 2.52 | 6.2  | S |
| (25,12) | 2.56 | 18.5 | S |
| (27,12) | 2.71 | 17.5 | M |
| (27,12) | 2.71 | 17.5 | M |
| (35,0)  | 2.74 | 0    | S |
| (31,7)  | 2.75 | 10   | M |
| (31,7)  | 2.75 | 10   | M |
| (27,13) | 2.76 | 18.6 | S |
| (30,9)  | 2.77 | 12.7 | M |
| (28,12) | 2.79 | 17   | S |
| (31,8)  | 2.79 | 11.2 | S |
| (36,0)  | 2.82 | 0    | M |
| (23,19) | 2.85 | 26.9 | S |
| (23,19) | 2.85 | 26.9 | S |
| (26,16) | 2.88 | 22.2 | S |
| (33,7)  | 2.9  | 9.4  | S |
| (31,10) | 2.9  | 13.5 | M |
| (30,12) | 2.94 | 16.1 | M |
| (32,10) | 2.98 | 13.1 | S |
| (37,2)  | 2.98 | 2.6  | S |
| (24,20) | 2.99 | 27   | S |
| (26,18) | 3    | 24   | S |
| (30,16) | 3.12 | 20   | S |
| (26,20) | 3.13 | 25.7 | M |
| (27,19) | 3.14 | 24.3 | S |
| (30,16) | 3.17 | 20   | S |
| (28,19) | 3.21 | 23.7 | M |
| (28,19) | 3.21 | 23.7 | M |
| (37,8)  | 3.25 | 9.6  | S |
| (40,3)  | 3.26 | 3.6  | S |
| (32,15) | 3.26 | 18.2 | S |
| (28,20) | 3.27 | 24.5 | S |
| (41,2)  | 3.29 | 2.4  | M |
| (34,14) | 3.35 | 16.4 | S |
| (35,13) | 3.36 | 15.2 | S |
| (35,13) | 3.37 | 15.2 | S |
| (40,6)  | 3.39 | 6.9  | S |
| (25,25) | 3.39 | 30   | M |
| (42,5)  | 3.5  | 5.6  | S |
| (45,0)  | 3.52 | 0    | M |
| (41,8)  | 3.57 | 8.8  | M |
| (28,25) | 3.6  | 28.1 | M |
| (33,20) | 3.63 | 21.9 | S |
| (47,2)  | 3.76 | 2.1  | M |

|         |      |      |   |
|---------|------|------|---|
| (34,21) | 3.77 | 22.2 | S |
| (45,6)  | 3.78 | 6.2  | M |
| (32,24) | 3.81 | 25.3 | S |
| (44,12) | 4    | 11.7 | S |
| (35,28) | 4.28 | 26.3 | S |
| (45,17) | 4.35 | 15.4 | S |
| (52,10) | 4.51 | 8.6  | M |
| (43,24) | 4.61 | 20.7 | S |

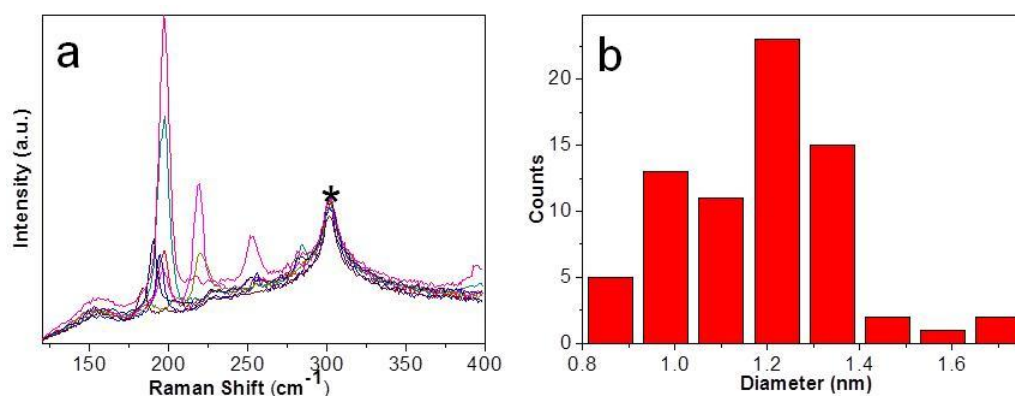

**Figure S1.** (a) Radial breathing modes (RBMs) in the Raman spectra of carbon nanotubes grown at 800 °C using CO as the carbon source ( $\lambda_{\text{excitation}} = 633 \text{ nm}$ ), the marked peaks are originated from the substrate. (b) Diameter distribution of SWNTs deduced from the RBM frequencies ( $\omega \text{ (cm}^{-1}\text{)} = 248 \text{ cm}^{-1}\cdot\text{nm/d (nm)}$ ), showing a mean diameter of 1.2 nm.

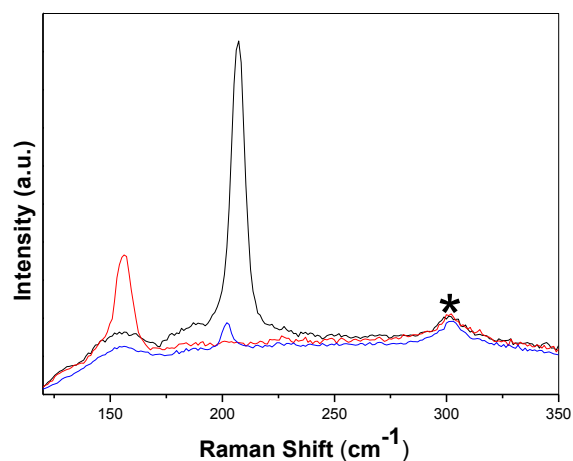

**Figure S1.** (a) RBMs in the Raman spectra of carbon nanotubes grown at 800 °C using CH<sub>4</sub> as the carbon source ( $\lambda_{\text{excitation}} = 633 \text{ nm}$ ). The marked peaks are originated from the substrate.

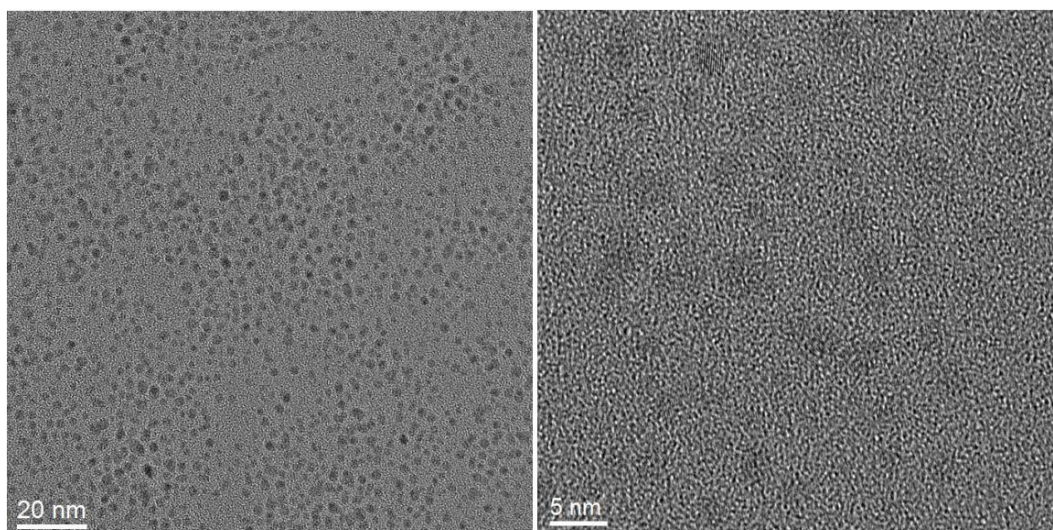

**Figure S3.** TEM images of synthesized Fe nanoparticles by microwave irradiation.

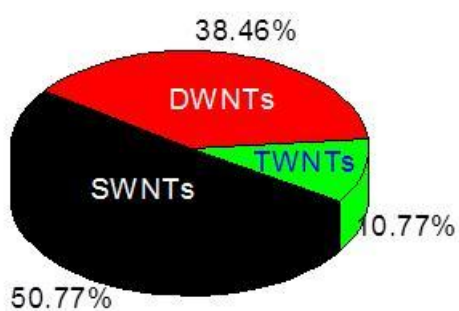

**Figure S4.** The wall number distribution of carbon nanotubes grown at 950 °C using CH<sub>4</sub> as the carbon source.

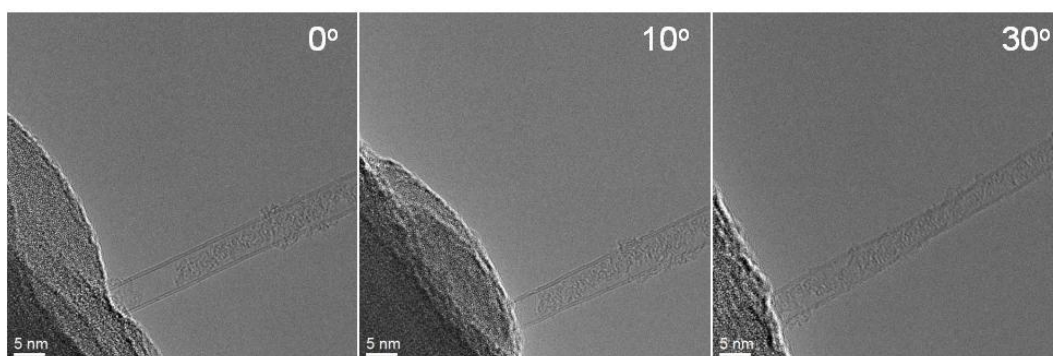

**Figure S5.** A series of TEM images of carbon nanostructures synthesized at 950 °C using CH<sub>4</sub> as carbon source obtained at different tilt angles.
